# Supplementary material for: Unveiling anharmonic scattering in van der Waals semiconductor GaPS4 through Raman spectroscopy and theoretical calculation
Source: PubMed Central journal article supplement — iScience. 2024 Sep 27;27(11):111040. doi: 10.1016/j.isci.2024.111040 (PMC11700654; doi:10.1016/j.isci.2024.111040), 2024-09-27
Supplement: mmc1.pdf [file mmc1.pdf]

iScience, Volume 27

## **Supplemental information**

### **Unveiling anharmonic scattering in van der Waals semiconductor GaPS<sub>4</sub> through Raman spectroscopy and theoretical calculation**

**Sihan Yan, Jingpeng Zhang, Jia-Han Zhang, Songrui Wei, Shaohui Zhang, Shan Li, Chee-Keong Tan, Mingming Jiang, Weihua Tang, and Zeng Liu**

**Table S1** Irreducible representation, calculated and fitted wavenumber of Raman peaks.

| Peak | Mode | Wavenumber (cm <sup>-1</sup> ) |       | Peak | Mode | Wavenumber (cm <sup>-1</sup> ) |       | Peak  | Mode | Wavenumber (cm <sup>-1</sup> ) |       |
|------|------|--------------------------------|-------|------|------|--------------------------------|-------|-------|------|--------------------------------|-------|
|      |      | Cal.                           | Exp.  |      |      | Cal.                           | Exp.  |       |      | Cal.                           | Exp.  |
| 1    | Ag1  | 60.9                           | 59.7  | 11   | Ag7  | 141.1                          | 150.2 | 21    | Ag13 | 337.2                          | 345.3 |
| 2    | Bg1  | 63.8                           | 65.6  | 12   | Bg7  | 150.7                          | 158.0 |       | Bg13 | 338.2                          |       |
| 3    | Ag2  | 70.5                           | 73.6  | 13   | Ag8  | 183.4                          | 191.2 | 22    | Ag14 | 370.7                          | 370.1 |
|      | Bg2  | 77.1                           |       |      | 14   | Bg8                            | 192.1 | 200.9 | 23   | Bg14                           | 386.2 |
| 4    | Ag3  | 81.8                           | 83.4  |      | Ag9  | 195.0                          |       | 24    | Bg15 | 413.4                          | 426.9 |
|      | Bg3  | 85.3                           |       | 15   | Bg9  | 201.6                          | 208.7 |       | Ag15 | 414.2                          |       |
| 5    | Ag4  | 89.4                           | 89.3  | 16   | Bg10 | 248.6                          | 260.9 | \     | Ag16 | 504.1                          | \     |
| 6    | Bg4  | 98.2                           | 101.2 | 17   | Ag10 | 256.8                          | 268.6 | 25    | Bg16 | 525.1                          | 522.6 |
| 7    | Ag5  | 107.6                          | 111.0 |      | Ag11 | 313.7                          | 309.0 | 26    | Ag17 | 537.0                          | 544.9 |
| 8    | Bg5  | 115.1                          | 120.8 | 18   | Bg11 | 314.8                          |       | 27    | Bg17 | 546.7                          | 559.8 |
| 9    | Ag6  | 121.1                          | 126.7 | 19   | Bg12 | 322.1                          | 322.4 |       | Ag18 | 574.6                          |       |
| 10   | Bg6  | 133.4                          | 138.5 | 20   | Ag12 | 330.9                          | 335.7 | 28    | Bg18 | 577.2                          | 594.9 |

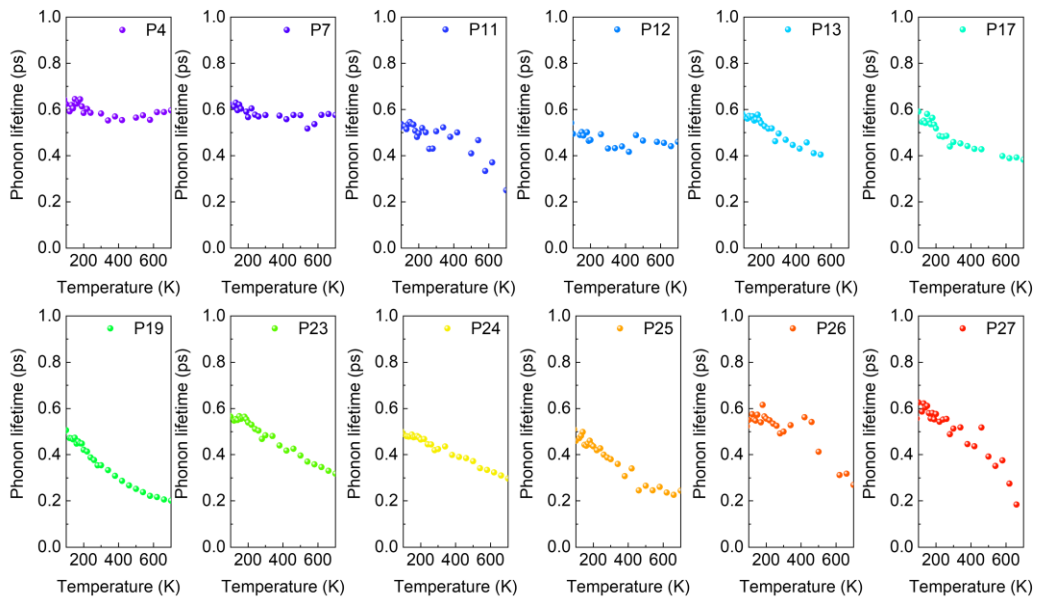

**Figure S1** Temperature-dependent phonon lifetimes of GaPS<sub>4</sub>, obtaining from the linewidth of Raman spectrum.

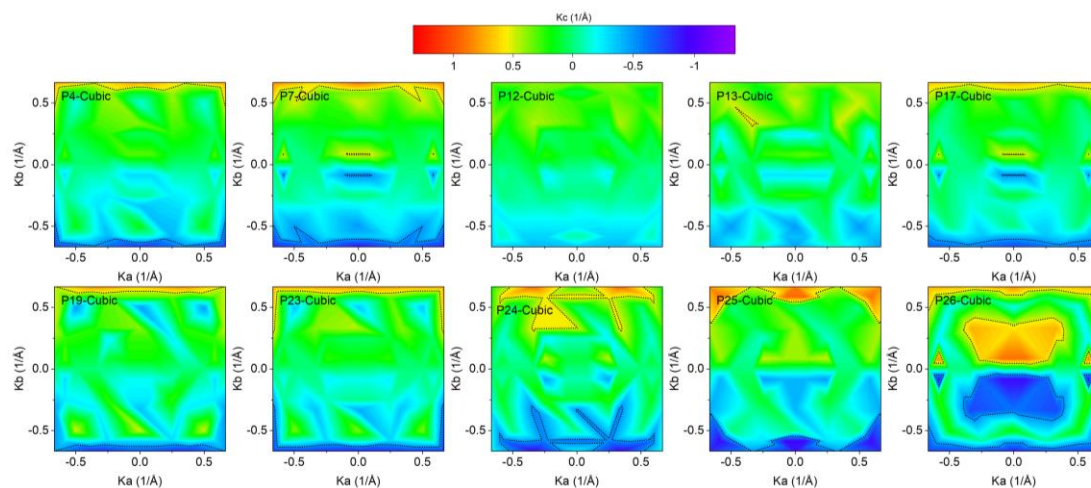

**Figure S2** Wavevector of phonons after phonon cubic anharmonic scattering, where the black dashed line represents the edge along the  $c$  direction of first Brillouin zone.

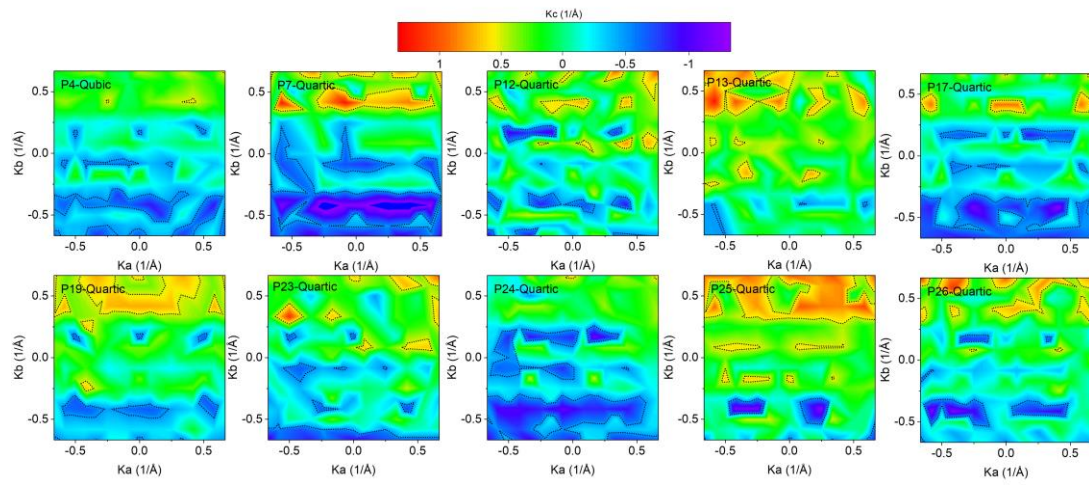

**Figure S3** Wavevector of phonons after phonon quartic anharmonic scattering, where the black dashed line represents the edge along the  $c$  direction of first Brillouin zone.

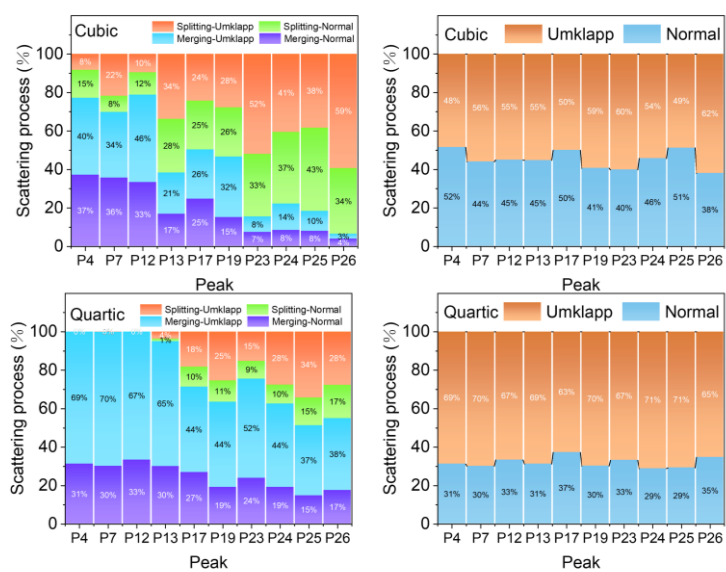

**Figure S4** Schematic diagram of the proportion of contributions from different process in phonon scattering.

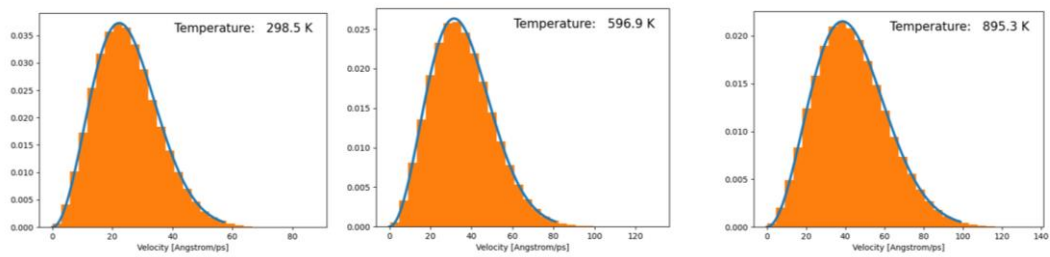

**Figure S5** Boltzmann distribution fitting results of the atoms velocity from Molecular Dynamics.

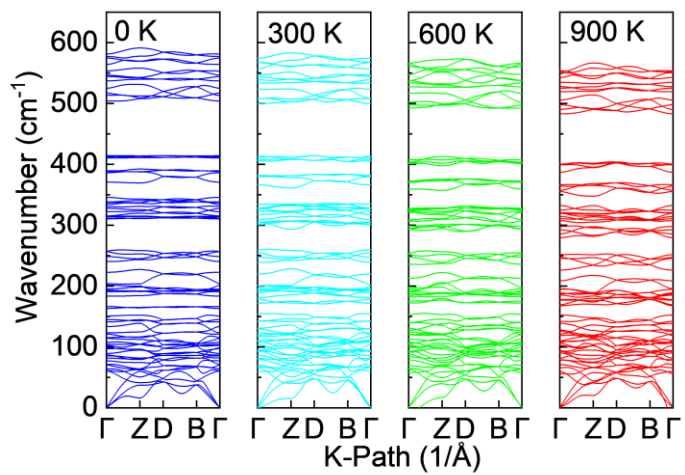

**Figure S6** Anharmonic phonon dispersion curves of GaPS<sub>4</sub> at 0K, 300K, 600K and 900K.
